# Supplementary material
Source: MDPI journal article supplement (https://www.mdpi.com/2071-1050/16/9/3622)
Supplement: s1 [file s1]

Archive with 3 entries (3 files):
- Table S1 Overview reviwed literature.pdf
- Table S2 Factors influencing the inner-outer gap.pdf
- Table S3 PRISMA_2020_checklist.pdf
