# Supplementary material
Source: MDPI journal article supplement (https://www.mdpi.com/2071-1050/16/9/3622)
Supplement: s1 [file s1 › Table S1 Overview reviwed literature.pdf]

|    | A                                                                                                                                                                                                                                                                                                                                                                                                             | B                                                                                                                                                            | C                 | D                 | E             | F                                     | G                           | H                     | I               | J                                                          | K                                        | L                 | M                   |
|----|---------------------------------------------------------------------------------------------------------------------------------------------------------------------------------------------------------------------------------------------------------------------------------------------------------------------------------------------------------------------------------------------------------------|--------------------------------------------------------------------------------------------------------------------------------------------------------------|-------------------|-------------------|---------------|---------------------------------------|-----------------------------|-----------------------|-----------------|------------------------------------------------------------|------------------------------------------|-------------------|---------------------|
| 1  | Bibliography                                                                                                                                                                                                                                                                                                                                                                                                  | Topic                                                                                                                                                        | Method            | Universities      | Scope region  | Target group                          | n                           | Self report of action | Problem-ized?   | Measurement action                                         | Conduction                               | category          | Search terms/ Nr.   |
| 2  | Babutsidze, Z., & Chai, A. (2018). Look at me saving the planet! The imitation of visible green behavior and its impact on the climate value-action gap. <i>Ecological Economics</i> , 146, 290–303. <a href="https://doi.org/10.1016/j.ecolecon.2017.10.017">https://doi.org/10.1016/j.ecolecon.2017.10.017</a>                                                                                              | Greenhouse Gas Mitigation Practices                                                                                                                          | empirical         | France, Australia | Australia     | consumer                              | 3096                        | x                     | no              | Self report action                                         | Online survey                            | Consumer desicion | Value-action gap 01 |
| 3  | Binder, M., & Blankenberg, A.-K. (2017). Green lifestyles and subjective well-being: More about self-image than actual behavior? <i>Journal of Economic Behavior &amp; Organization</i> , 137, 304–323. <a href="https://doi.org/10.1016/j.jebo.2017.03.009">https://doi.org/10.1016/j.jebo.2017.03.009</a>                                                                                                   | Green lifestyle                                                                                                                                              | empirical         | Germany           | UK            | consumer                              | 78165                       | x                     | yes             | Self report action                                         | Interviews, Household Longitudinal Study | Consumer desicion | Value-action gap 02 |
| 4  | Chai, A., Bradley, G., Lo, A., & Reser, J. (2015). What time to adapt? The role of discretionary time in sustaining the climate change value–action gap. <i>Ecological Economics</i> , 116, 95–107. <a href="https://doi.org/10.1016/j.ecolecon.2015.04.013">https://doi.org/10.1016/j.ecolecon.2015.04.013</a>                                                                                               | Discretionary time (role of)                                                                                                                                 | empirical         | Australia         | Australia     | citizens                              | 3096                        | x                     | no              | Self report action knowledge                               | Online survey                            |                   | Value-action gap 03 |
| 5  | Chung, S.-S., & Leung, M. M.-Y. (2007). The value-action gap in waste recycling: The case of undergraduates in hong kong. <i>Environmental Management</i> , 40(4), 603–612. <a href="https://doi.org/10.1007/s00267-006-0363-y">https://doi.org/10.1007/s00267-006-0363-y</a>                                                                                                                                 | Waste recycling                                                                                                                                              | empirical         | Hong Kong         | Hong Kong USA | students                              | 386                         | x                     | yes             | Self report and collective measurment of recycleed wasted  | Survey                                   | Consumer desicion | Value-action gap 04 |
| 6  | Fang, W.-T., Chiang, Y.-T., Ng, E., & Lo, J.-C. (2019). Using the norm activation model to predict the pro-environmental behaviors of public servants at the central and local governments in taiwan. <i>Sustainability</i> , 11(13), 3712. <a href="https://doi.org/10.3390/su11133712">https://doi.org/10.3390/su11133712</a>                                                                               | Pro-Environmental Behaviors of public servants                                                                                                               | empirical         | Taiwan, Australia | Taiwan        | civil servants                        | 7567                        | x                     | no              | Self report action                                         | Mail survey                              | Consumer desicion | Value-action gap 05 |
| 7  | Flynn, R., Bellaby, P., & Ricci, M. (2009). The 'value-action gap' in public attitudes towards sustainable energy: The case of hydrogen energy. <i>The Sociological Review</i> , 57(2_suppl), 159–180. <a href="https://doi.org/10.1111/j.1467-954X.2010.01891.x">https://doi.org/10.1111/j.1467-954X.2010.01891.x</a>                                                                                        | Hydrogen energy                                                                                                                                              | empirical (qual.) | UK                | UK            | local authorities                     | 47/ 7 focus groups          | x                     | yes             | Self report intention                                      | Focus groups                             | Consumer desicion | Value-action gap 06 |
| 8  | Fudge, S., & Peters, M. (2011). Behaviour change in the UK climate debate: An assessment of responsibility, agency and political dimensions. <i>Sustainability</i> , 3(6), 789–808. <a href="https://doi.org/10.3390/su3060789">https://doi.org/10.3390/su3060789</a>                                                                                                                                         | Household energy use, use of domestic appliances and transport habits (Inadvertent) environmentalism in achieving winter warmth (>70) and divestment (16-19) | empirical (qual.) | UK                | UK            | consumer                              | approx. 120/12 focus groups | x                     | no              | No system of conduction reported, real action not in focus | Focus groups                             | Consumer desicion | Value-action gap 08 |
| 9  | Hitchings, R., Collins, R., & Day, R. (2015). Inadvertent environmentalism and the action–value opportunity: Reflections from studies at both ends of the generational spectrum. <i>Local Environment</i> , 20(3), 369–385. <a href="https://doi.org/10.1080/13549839.2013.852524">https://doi.org/10.1080/13549839.2013.852524</a>                                                                           | Social Responsible Consumption (forced by regulation)                                                                                                        | empirical (qual.) | UK                | UK            | young and old people                  | 21+23                       |                       | action measured | Actions (photos) combined with self report measured        | Interviews, photo (diaries)              | Consumer desicion | Value-action gap 09 |
| 10 | Lee, J.-M., Kim, H.-J., & Rha, J.-Y. (2017). Shopping for society? Consumers' value conflicts in socially responsible consumption affected by retail regulation. <i>Sustainability</i> , 9(11), 1968. <a href="https://doi.org/10.3390/su9111968">https://doi.org/10.3390/su9111968</a>                                                                                                                       |                                                                                                                                                              | empirical (qual.) | Korea             | South Korea   | consumer                              | 30                          |                       | action measured | Action (consumption) measured                              | Q-sort, Consumption measured             | Consumer desicion | Value-action gap 10 |
| 11 | Olson, E. L. (2013). It's not easy being green: The effects of attribute tradeoffs on green product preference and choice. <i>Journal of the Academy of Marketing Science</i> , 41(2), 171–184. <a href="https://doi.org/10.1007/s11747-012-0305-6">https://doi.org/10.1007/s11747-012-0305-6</a>                                                                                                             | Car and TV choice                                                                                                                                            | empirical         | Norway            | Norway        | consumer                              | 134                         | x                     | no              | Self report intention                                      | Full-profile conjoint analysis           | Consumer desicion | Value-action gap 12 |
| 12 | Panda, T. K., Kumar, A., Jakhar, S., Luthra, S., Garza-Reyes, J. A., Kazancoglu, I., & Nayak, S. S. (2020). Social and environmental sustainability model on consumers' altruism, green purchase intention, green brand loyalty and evangelism. <i>Journal of Cleaner Production</i> , 243, 118575. <a href="https://doi.org/10.1016/j.jclepro.2019.118575">https://doi.org/10.1016/j.jclepro.2019.118575</a> | Green brand loyalty and evangelism                                                                                                                           | empirical         | India, UK, Turkey | India         | consumer of green products, graduates | 331                         | x                     | no              | Self report intention (action only for some participants)  | Online survey                            |                   | Value-action gap 13 |
| 13 | Quaglione, D., Cassetta, E., Crociata, A., Marra, A., & Sarra, A. (2019). An assessment of the role of cultural capital on sustainable mobility behaviours: Conceptual framework and empirical evidence. <i>Socio-Economic Planning Sciences</i> , 66, 24–34. <a href="https://doi.org/10.1016/j.seps.2018.07.005">https://doi.org/10.1016/j.seps.2018.07.005</a>                                             | Alternatives to car using                                                                                                                                    | empirical         | Italy             | Italy         | consumer                              | 44984                       | x                     | no              | Self report action                                         | Household Longitudinal Study             | Consumer desicion | Value-action gap 15 |
| 14 | Robb, J., Hagggar, J., Lamboll, R., & Castellanos, E. (2019). Exploring the value–action gap through shared values, capabilities and deforestation behaviours in guatemala. <i>Environmental Conservation</i> , 46(03), 226–233. <a href="https://doi.org/10.1017/S0376892919000067">https://doi.org/10.1017/S0376892919000067</a>                                                                            | Deforestation and forest degradation                                                                                                                         | empirical (qual.) | UK, Guatemala     | Guatemala     | land users                            | 402                         |                       | action measured | Action (amount of owned forest) measured                   | Interviews , focus group discussions     |                   | Value-action gap 16 |
| 15 | van Riper, C. J., Lum, C., Kyle, G. T., Wallen, K. E., Absher, J., & Landon, A. C. (2020). Values, motivations, and intentions to engage in proenvironmental behavior. <i>Environment and Behavior</i> , 52(4), 437–462. <a href="https://doi.org/10.1177/0013916518807963">https://doi.org/10.1177/0013916518807963</a>                                                                                      | Proenvironmental Behavior and values                                                                                                                         | empirical         | USA               | USA           | white water rafter                    | 242                         | x                     | no              | Self report action (performed behavioral intentions)       | Survey                                   | Consumer desicion | Value-action gap 18 |
| 16 | Whitmarsh, L., Seyfang, G., & O'Neill, S. (2011). Public engagement with carbon and climate change: To what extent is the public 'carbon capable'? <i>Global Environmental Change</i> , 21(1), 56–65. <a href="https://doi.org/10.1016/j.gloenvcha.2010.07.011">https://doi.org/10.1016/j.gloenvcha.2010.07.011</a>                                                                                           | Low-carbon lifestyle                                                                                                                                         | empirical         | UK, Australia     | UK            | consumer                              | 551                         | x                     | no              | Self report action                                         | Postal survey                            | Consumer desicion | Value-action gap 19 |

|    | A                                                                                                                                                                                                                                                                                                                                                                                                      | B                                                               | C                 | D                             | E            | F                                                     | G                  | H                     | I                  | J                                                                    | K                                                                    | L                 | M                            |
|----|--------------------------------------------------------------------------------------------------------------------------------------------------------------------------------------------------------------------------------------------------------------------------------------------------------------------------------------------------------------------------------------------------------|-----------------------------------------------------------------|-------------------|-------------------------------|--------------|-------------------------------------------------------|--------------------|-----------------------|--------------------|----------------------------------------------------------------------|----------------------------------------------------------------------|-------------------|------------------------------|
|    | Bibliography                                                                                                                                                                                                                                                                                                                                                                                           | Topic                                                           | Method            | Universities                  | Scope region | Target group                                          | n                  | Self report of action | Problem- matized?  | Measurement action                                                   | Conduction                                                           | category          | Search terms/ Nr.            |
| 17 | Baker, Z., Ekstrom, J. A., Meagher, K. D., Preston, B. L., & Bedsworth, L. (2020). The social structure of climate change research and practitioner engagement: Evidence from California. <i>Global Environmental Change</i> , 63, 102074. <a href="https://doi.org/10.1016/j.gloenvcha.2020.102074">https://doi.org/10.1016/j.gloenvcha.2020.102074</a>                                               | Information flow on climate change                              | empirical         | USA                           | USA          | researcher on climate change                          | 991+ 13 interviews | x                     | no                 | Self report action                                                   | Survey/Interview                                                     |                   | Knowledge-action gap 01      |
| 18 | Parth, S., Schickl, M., Keller, L., & Stoetter, J. (2020). Quality child–parent relationships and their impact on intergenerational learning and multiplier effects in climate change education: are we bridging the knowledge–action gap? <i>Sustainability</i> , 12(17), 1–16. <a href="https://doi.org/10.3390/su12177030">https://doi.org/10.3390/su12177030</a>                                   | Climate Change Education                                        | empirical         | Austria                       |              | students and parents                                  | 178                | x                     | no                 | Self report action (conduction not reported)                         | Paper survey                                                         |                   | Knowledge-action gap 05      |
| 19 | Mairesse, O., Macharis, C., Lebeau, K., & Turcksin, L. (2012). Understanding the attitude-action gap: Functional integration of environmental aspects in car purchase intentions. <i>Psicologica: International Journal of Methodology and Experimental Psychology</i> , 33(3), 547–574.                                                                                                               | Eco friendly vehicles                                           | empirical         | Belgium                       | Belgium      | consumer                                              | 27+47              | x                     | yes                | Self report preference                                               | Functional Measurement                                               | Consumer desicion | Attitude-action gap 05       |
| 20 | Newton, P., & Meyer, D. (2013). Exploring the attitudes-action gap in household resource consumption: Does “environmental lifestyle” segmentation align with consumer behaviour? <i>Sustainability</i> , 5(3), 1211–1233. <a href="https://doi.org/10.3390/su5031211">https://doi.org/10.3390/su5031211</a>                                                                                            | Household resource consumption                                  | empirical         | Australia                     | Australia    | consumer                                              | 1250               |                       | action measured    | (consumption for electricity, gas and water -based on bills, housing | Postal survey                                                        | Consumer desicion | Attitude-action gap 06       |
| 21 | Banerjee, P., Peterson, T. R., Liles, M. J., Banerjee, R., & Peterson, M. J. (2020). How key sociodemographic and spatial variables influence stakeholders' social control frames regarding natural resource conservation in east sikkim, india. <i>Biological Conservation</i> , 245, 108528. <a href="https://doi.org/10.1016/j.biocon.2020.108528">https://doi.org/10.1016/j.biocon.2020.108528</a> | Forest conservation                                             | empirical         | USA, El Salvador, India       | India        | stakeholders in natural resource conservation         | 200                |                       | no action measured | Self report intention                                                | Interviews                                                           |                   | Intention-action gap 01      |
| 22 | Fabian, M. C., Cook, A. S., & Old, J. M. (2020). Do australians have the willingness to participate in wildlife conservation? <i>Australian Zoologist</i> , 40(4), 575–584. <a href="https://doi.org/10.7882/AZ.2019.010">https://doi.org/10.7882/AZ.2019.010</a>                                                                                                                                      | Wildlife conservation                                           | empirical         | Australia                     | Australia    | citizens                                              | 312                | x                     | yes                | self report action, attitude, intention                              | Online survey                                                        | Consumer desicion | Intention-action gap 02      |
| 23 | Hand, M. S., Roman, L. A., Locke, D. H., & Fichman, E. S. (2019). Phone-call reminders narrow the intention-action gap by increasing follow-through for a residential tree giveaway program. <i>Urban Forestry &amp; Urban Greening</i> , 44, 126425. <a href="https://doi.org/10.1016/j.ufug.2019.126425">https://doi.org/10.1016/j.ufug.2019.126425</a>                                              | Residental tree giveaway                                        | empirical         | USA                           | USA          | interested persons                                    | 251                |                       | action measured    | Action (attandency) measured                                         | Registration attandency                                              | Consumer desicion | Intention-action gap 03      |
| 24 | Koning, J. I. de, Ta, T. H., Crul, M. R., Wever, R., & Brezet, J. C. (2016). Getgreen vietnam: Towards more sustainable behaviour among the urban middle class. <i>Journal of Cleaner Production</i> , 134, 178–190. <a href="https://doi.org/10.1016/j.jclepro.2016.01.063">https://doi.org/10.1016/j.jclepro.2016.01.063</a>                                                                         | Eco friendly behaviour-training                                 | empirical         | Netherlands, Vietnam, Denmark | Vietnam      | course attendents                                     | 604/115            | x                     | yes                | Self report action                                                   | Individual survey, group survey                                      |                   | Intention-action gap 04      |
| 25 | Kuo, F.-Y., & Young, M.-L. (2008). A study of the intention–action gap in knowledge sharing practices. <i>Journal of the American Society for Information Science and Technology</i> , 59(8), 1224–1237. <a href="https://doi.org/10.1002/asi.20816">https://doi.org/10.1002/asi.20816</a>                                                                                                             | Information sharing                                             | empirical         | Taiwan                        | Taiwan       | teachers                                              | 304                |                       | action measured    | Action (information sharing) measured and self report attitude etc.  | Online survey and measurement activity on knowledge sharing platform |                   | Intention-action gap 5       |
| 26 | Lee, E., Kang, M., Song, J., & Kang, M. (2020). From intention to action: Habits, feedback and optimizing energy consumption in south korea. <i>Energy Research &amp; Social Science</i> , 64, 101430. <a href="https://doi.org/10.1016/j.erss.2020.101430">https://doi.org/10.1016/j.erss.2020.101430</a>                                                                                             | Energy consumption                                              | empirical         | South Korea, USA              | South Korea  | consumer                                              | 671                |                       | action measured    | Action (energy consumption) measured                                 | Measurement and survey                                               | Consumer desicion | Intention-action gap 06      |
| 27 | Brooks, J., Bock, T., & Narvaez, D. (2013). Moral motivation, moral judgment, and antisocial behavior. <i>Journal of Research in Character Education</i> , 9(2), 149–165.                                                                                                                                                                                                                              | Antisocial behavior and moral motivation/judgment               | empirical         | USA                           | USA          | undergraduat e students                               | 440                | x                     | yes                | Self report action                                                   | Paper survey                                                         |                   | Judgment-action gap 01       |
| 28 | Stephens, J. M. (2018). Bridging the divide: The role of motivation and self-regulation in explaining the judgment-action gap related to academic dishonesty. <i>Frontiers in Psychology</i> , 9, 246. <a href="https://doi.org/10.3389/fpsyg.2018.00246">https://doi.org/10.3389/fpsyg.2018.00246</a>                                                                                                 | Academic dishonesty                                             | empirical         | New Zealand                   | USA          | secondary students                                    | 380                | x                     | no                 | Self report action                                                   | Online survey                                                        | Consumer desicion | Judgment-action gap 08       |
| 29 | Davis, J. L., Le, B., & Coy, A. E. (2011). Building a model of commitment to the natural environment to predict ecological behavior and willingness to sacrifice. <i>Journal of Environmental Psychology</i> , 31(3), 257–265. <a href="https://doi.org/10.1016/j.jenvp.2011.01.004">https://doi.org/10.1016/j.jenvp.2011.01.004</a>                                                                   | Commitment to the natural environment, willingness to sacrifice | empirical         | USA                           | USA          | undergraduat e students                               | 248                | x                     | yes                | Self report action                                                   | Survey                                                               |                   | (via snowball conduction 02) |
| 30 | Grant, P., Arjoon, S., & McGhee, P. (2018). In pursuit of eudaimonia: how virtue ethics captures the self-understandings and roles of corporate directors. <i>Journal of Business Ethics : JOBE</i> , 153(2), 389–406.                                                                                                                                                                                 | Ethical desicions in companys                                   | empirical (qual.) | New Zealand                   | New Zealand  | company directors                                     | 34                 | x                     | yes                | Self report action                                                   | Interviews                                                           |                   | (via snowball conduction 04) |
| 31 | Glöckner, C. A., & Blöbaum, A. (2010). A comprehensive action determination model: Toward a broader understanding of ecological behaviour using the example of travel mode choice. <i>Journal of Environmental Psychology</i> , 30(4), 574–586. <a href="https://doi.org/10.1016/j.jenvp.2010.03.001">https://doi.org/10.1016/j.jenvp.2010.03.001</a>                                                  | Travel mode choice                                              | empirical         | Norway, Germany               | Germany      | students                                              | 389                |                       | action measured    | Action (travel mode via travel log) measured                         | Online survey and travel log                                         | Consumer desicion | (via snowball conduction 06) |
| 32 | Křepelková, Š. D., Krajhanzl, J., & Kroufek, R. (2020). The influence of interaction with nature in childhood on future pro-environmental behavior. <i>Journal of Baltic Science Education</i> , 19(4), 536–550. <a href="https://doi.org/10.33225/jbse/20.19.536">https://doi.org/10.33225/jbse/20.19.536</a>                                                                                         | Pro-environmental behavior                                      | empirical         | Czech                         | Czech        | adults not studying or working in nature conservation | 370                | x                     | yes                | Self report action                                                   | Online survey                                                        |                   | (via snowball conduction 08) |

|    | A                                                                                                                                                                                                                                                                                                                                                                                                                            | B                                                           | C                 | D             | E            | F                 | G           | H                     | I                 | J                  | K          | L                 | M                                            |
|----|------------------------------------------------------------------------------------------------------------------------------------------------------------------------------------------------------------------------------------------------------------------------------------------------------------------------------------------------------------------------------------------------------------------------------|-------------------------------------------------------------|-------------------|---------------|--------------|-------------------|-------------|-----------------------|-------------------|--------------------|------------|-------------------|----------------------------------------------|
|    |                                                                                                                                                                                                                                                                                                                                                                                                                              |                                                             |                   |               |              |                   |             |                       |                   |                    |            |                   |                                              |
| 1  | Bibliography                                                                                                                                                                                                                                                                                                                                                                                                                 | Topic                                                       | Method            | Universities  | Scope region | Target group      | n           | Self report of action | Problem- matized? | Measurement action | Conduction | category          | Search terms/ Nr.                            |
|    | Klöckner, C. A. (2013). A comprehensive model of the psychology of environmental behaviour—a meta-analysis. <i>Global Environmental Change</i> , 23(5), 1028–1038. <a href="https://doi.org/10.1016/j.gloenvcha.2013.05.014">https://doi.org/10.1016/j.gloenvcha.2013.05.014</a>                                                                                                                                             | Psychology of environmental behaviour                       | meta-analysis     | Norway        |              |                   | 41 studies  |                       |                   |                    |            | Consumer desicion | (via snowball conduction 09)                 |
| 33 | Hertz, S. G., & Krettenauer, T. (2016). Does moral identity effectively predict moral behavior? A meta-analysis. <i>Review of General Psychology</i> , 20(2), 129–140. <a href="https://doi.org/10.1037/gpr0000062">https://doi.org/10.1037/gpr0000062</a>                                                                                                                                                                   | Moral Identity                                              | meta-analysis     | Canada        |              |                   | 111 studies |                       |                   |                    |            | Morality          | (via snowball conduction 05)                 |
| 34 | Anable, J., Lane, B., & Kelay, T. (July 2006). An Evidence Base Review of Public Attitudes to Climate Change and Transport. UK Department for Transport.                                                                                                                                                                                                                                                                     | Transport behavior (and public attitudes to climate change) | literature review | UK            |              |                   |             |                       |                   |                    |            | Consumer desicion | (via snowball conduction 01)                 |
| 35 | Frimer, J. A., & Walker, L. J. (2008). Towards a new paradigm of moral personhood. <i>Journal of Moral Education</i> , 37(3), 333–356. <a href="https://doi.org/10.1080/03057240802227494">https://doi.org/10.1080/03057240802227494</a>                                                                                                                                                                                     | Moral personhood                                            | literature review | Canada        |              |                   |             |                       |                   |                    |            | Morality          | (via snowball conduction 03)                 |
| 36 | Jennings, P. L., Mitchell, M. S., & Hannah, S. T. (2015). The moral self: A review and integration of the literature. <i>Journal of Organizational Behavior</i> , 36(S1), S104–S168. <a href="https://doi.org/10.1002/job.1919">https://doi.org/10.1002/job.1919</a>                                                                                                                                                         | Moral self in organizations                                 | literature review | USA           |              |                   |             |                       |                   |                    |            | Morality          | (via snowball conduction 10)                 |
| 37 | Kollmuss, A., & Agyeman, J. (2002). Mind the gap: Why do people act environmentally and what are the barriers to pro-environmental behavior? <i>Environmental Education Research</i> , 8(3), 239–260. <a href="https://doi.org/10.1080/13504620220145401">https://doi.org/10.1080/13504620220145401</a>                                                                                                                      | Pro-environmental behavior                                  | literature review | USA           |              |                   |             |                       |                   |                    |            |                   | (via snowball conduction 07)                 |
| 38 | Frederiks, E. R., Stenner, K., & Hobman, E. V. (2015). Household energy use: Applying behavioural economics to understand consumer decision-making and behaviour. <i>Renewable and Sustainable Energy Reviews</i> , 41, 1385–1394. <a href="https://doi.org/10.1016/j.rser.2014.09.026">https://doi.org/10.1016/j.rser.2014.09.026</a>                                                                                       | Houshold energy consumption                                 | literature review | Australia     |              |                   |             |                       |                   |                    |            | Consumer desicion | Value-action gap 07                          |
| 39 | Adnan, N., Nordin, S. M., Rahman, I., & Amini, M. H. (2017). A market modeling review study on predicting malaysian consumer behavior towards widespread adoption of phev/ev. <i>Environmental Science and Pollution Research International</i> , 24(22), 17955–17975. <a href="https://doi.org/10.1007/s11356-017-9153-8">https://doi.org/10.1007/s11356-017-9153-8</a>                                                     | Electronic vehicles                                         | literature review | Malaysia, USA | Malaysia     | consumer          |             |                       |                   |                    |            | Consumer desicion | Attitude-action gap 01                       |
| 40 | DeTienne, K. B., Ellertson, C. F., Ingerson, M.-C., & Dudley, W. R. (2019). Moral development in business ethics: An examination and critique. <i>Journal of Business Ethics</i> , 1–20. <a href="https://doi.org/10.1007/s10551-019-04351-0">https://doi.org/10.1007/s10551-019-04351-0</a>                                                                                                                                 | Theories of moral development                               | literature review | USA           |              |                   |             |                       |                   |                    |            | Morality          | Judgment-action gap 02                       |
| 41 | Noortgaete, F., & Tavernier, J. de (2014). Affected by nature: A hermeneutical transformation of environmental ethics. <i>Zygon: Journal of Religion &amp; Science</i> , 49(3), 572–592.                                                                                                                                                                                                                                     | Affect towards nature                                       | theoretical       | Belgium       |              |                   |             |                       |                   |                    |            | Morality          | Value-action gap 11                          |
| 42 | Pitt, J. (2009). Blurring the boundaries--stem education and education for sustainable development. <i>Design and Technology Education</i> , 14(1), 37–48.                                                                                                                                                                                                                                                                   | STEM education and education for sustainable development    | theoretical       | UK            | England      |                   |             |                       |                   |                    |            |                   | Value-action gap 14                          |
| 43 | Sharpe, J. (2016). Understanding and unlocking transformative learning as a method for enabling behaviour change for adaptation and resilience to disaster threats. <i>International Journal of Disaster Risk Reduction</i> , 17, 213–219. <a href="https://doi.org/10.1016/j.ijdrr.2016.04.014">https://doi.org/10.1016/j.ijdrr.2016.04.014</a>                                                                             | Transformative learning                                     | theoretical       | UK            |              |                   |             |                       |                   |                    |            |                   | Value-action gap 17                          |
| 44 | Darnell, C., Gulliford, L., Kristjánsson, K., & Paris, P. (2019). Phronesis and the knowledge-action gap in moral psychology and moral education: A new synthesis? <i>Human Development</i> , 62(3), 101–129. <a href="https://doi.org/10.1159/000496136">https://doi.org/10.1159/000496136</a>                                                                                                                              | Aristotlan concept of phronesis                             | theoretical       | UK            |              |                   |             |                       |                   |                    |            | Morality          | Knowledge-action gap 03/ Value-action gap 07 |
| 45 | Nguyen, V. M., Young, N., & Cooke, S. J. (2017). A roadmap for knowledge exchange and mobilization research in conservation and natural resource management. <i>Conservation Biology : The Journal of the Society for Conservation Biology</i> , 31(4), 789–798. <a href="https://doi.org/10.1111/cobi.12857">https://doi.org/10.1111/cobi.12857</a>                                                                         | knowledge exchange and action                               | theoretical       | Canada        |              |                   |             |                       |                   |                    |            |                   | Knowledge-action gap 04                      |
| 46 | Bowerman, T., & Markowitz, E. M. (2012). Author response to: The attitude-action gap: Toward a better understanding of “how much is enough?”. <i>Analyses of Social Issues and Public Policy</i> , 12(1), 230–238. <a href="https://doi.org/10.1111/j.1530-2415.2012.01294.x">https://doi.org/10.1111/j.1530-2415.2012.01294.x</a>                                                                                           | Author response to critique on target article               | theoretical       | USA           |              |                   |             |                       |                   |                    |            | Morality          | Attitude-action gap 02                       |
| 47 | Kaaronen, R. O. (2017). Affording sustainability: Adopting a theory of affordances as a guiding heuristic for environmental policy. <i>Frontiers in Psychology</i> , 8, 1974. <a href="https://doi.org/10.3389/fpsyg.2017.01974">https://doi.org/10.3389/fpsyg.2017.01974</a>                                                                                                                                                | Affordance of sustainable behavior                          | theoretical       | Finland       |              |                   |             |                       |                   |                    |            | Consumer desicion | Attitude-action gap 03                       |
| 48 | Lane, B., & Potter, S. (2007). The adoption of cleaner vehicles in the UK: Exploring the consumer attitude–action gap. <i>Journal of Cleaner Production</i> , 15(11-12), 1085–1092. <a href="https://doi.org/10.1016/j.jclepro.2006.05.026">https://doi.org/10.1016/j.jclepro.2006.05.026</a>                                                                                                                                | Eco friendly vehicles                                       | theoretical       | UK            |              | consumer          |             |                       |                   |                    |            | Consumer desicion | Attitude-action gap 04                       |
| 49 | Saddawi-Konefka, D., Schumacher, D. J., Baker, K. H., Charnin, J. E., & Gollwitzer, P. M. (2016). Changing physician behavior with implementation intentions: Closing the gap between intentions and actions. <i>Academic Medicine : Journal of the Association of American Medical Colleges</i> , 91(9), 1211–1216. <a href="https://doi.org/10.1097/ACM.0000000000001172">https://doi.org/10.1097/ACM.0000000000001172</a> | Implementation intention in educational training            | theoretical       | USA           |              | medical educators |             |                       |                   |                    |            |                   | Intention-action gap 07                      |

|    | A                                                                                                                                                                                                                                                                                | B                                                        | C           | D            | E            | F            | G | H                     | I                 | J                  | K          | L        | M                       |
|----|----------------------------------------------------------------------------------------------------------------------------------------------------------------------------------------------------------------------------------------------------------------------------------|----------------------------------------------------------|-------------|--------------|--------------|--------------|---|-----------------------|-------------------|--------------------|------------|----------|-------------------------|
| 1  | Bibliography                                                                                                                                                                                                                                                                     | Topic                                                    | Method      | Universities | Scope region | Target group | n | Self report of action | Problem- matized? | Measurement action | Conduction | category | Search terms/ Nr.       |
| 51 | Suomala, J. (2020). The consumer contextual decision-making model. <i>Frontiers in Psychology</i> , 11, Article 570430. <a href="https://doi.org/10.3389/fpsyg.2020.570430">https://doi.org/10.3389/fpsyg.2020.570430</a>                                                        | Consumer behaviors                                       | theoretical | Finland      |              |              |   |                       |                   |                    |            |          | Intention-action gap 08 |
| 52 | Higgins-D'Alessandro, A. (2008). The judgment-action gap: a modest proposal. In F. Oser & W. Veugelers (Eds.), <i>Getting involved</i> (pp. 103–118). Sense Publishers. <a href="https://doi.org/10.1163/9789087906368_008">https://doi.org/10.1163/9789087906368_008</a>        | Moral self processes                                     | theoretical | USA          |              |              |   |                       |                   |                    |            | Morality | Judgment-action gap 03  |
| 53 | Holtam, B. W. (2012). Let's call it what it is:: A matter of conscience. <i>Critical issues in the future of learning and teaching: v. 6</i> . Sense Publishers.                                                                                                                 | Conscience education                                     | theoretical | Canada       |              |              |   |                       |                   |                    |            | Morality | Judgment-action gap 04  |
| 54 | Krettenauer, T. (2019). The gappiness of the "gappiness problem". <i>Human Development</i> , 62(3), 142–145. <a href="https://doi.org/10.1159/000496518">https://doi.org/10.1159/000496518</a>                                                                                   | Differentiating gaps to prepare model                    | theoretical | Canada       |              |              |   |                       |                   |                    |            | Morality | Judgment-action gap 05  |
| 55 | Reed, D. C. (2009). A multi-level model of moral functioning revisited. <i>Journal of Moral Education</i> , 38(3), 299–313. <a href="https://doi.org/10.1080/03057240903101523">https://doi.org/10.1080/03057240903101523</a>                                                    | Reaction to response to approaching an integrative model | theoretical | USA          |              |              |   |                       |                   |                    |            | Morality | Judgment-action gap 06  |
| 56 | Reed, D. C., & Stoermer, R. M. (2008). Towards an integrated model of moral functioning: An overview of the special issue. <i>Journal of Moral Education</i> , 37(3), 417–428. <a href="https://doi.org/10.1080/03057240802227643">https://doi.org/10.1080/03057240802227643</a> | Overview preparatory work for an integrative model       | theoretical | USA          |              |              |   |                       |                   |                    |            | Morality | Judgment-action gap 07  |
| 57 | Sweeney, P. J., Imboden, M. W., & Hannah, S. T. (2015). Building moral strength: Bridging the moral judgment-action gap. 2015(146), 17–33. <a href="https://doi.org/10.1002/vd.20132">https://doi.org/10.1002/vd.20132</a>                                                       | Student leadership education                             | theoretical | USA          |              |              |   |                       |                   |                    |            | Morality | Judgment-action gap 09  |
