# Supplementary material
Source: MDPI journal article supplement (https://www.mdpi.com/2071-1050/16/9/3622)
Supplement: s1 [file s1 › Table S2 Factors influencing the inner-outer gap.pdf]

|    | A                                               | B                                                                                                                                                                                                                                                                                                                                                                                                                                                                                                                                                                                                                                                           | C                                                          | D         | E                 | F             | G                           |
|----|-------------------------------------------------|-------------------------------------------------------------------------------------------------------------------------------------------------------------------------------------------------------------------------------------------------------------------------------------------------------------------------------------------------------------------------------------------------------------------------------------------------------------------------------------------------------------------------------------------------------------------------------------------------------------------------------------------------------------|------------------------------------------------------------|-----------|-------------------|---------------|-----------------------------|
|    | Factor                                          | Description                                                                                                                                                                                                                                                                                                                                                                                                                                                                                                                                                                                                                                                 | Source                                                     | Influence | Retrieve-<br>ment | Activation C1 | Focus C1                    |
| 1  | Ambivalent bystander                            | A group that pursues personal and social values but has a discrepancy between stated values and actual behavior, they agree with regulations through politics.                                                                                                                                                                                                                                                                                                                                                                                                                                                                                              | Lee et al. 2017                                            | negative  | direct            | Stable        | Not specifically assignable |
| 2  | Amplifying wellbeing through a green self-image | "We have found that there is a connection between life satisfaction and green lifestyle but it is mostly due to self-image (i.e. one's own assessment of how environmentally-friendly one's behavior is) and not due to concrete pro-environmental behaviors such as conserving water, recycling and so on."                                                                                                                                                                                                                                                                                                                                                | Binder & Blankenberg 2017, p. 320                          | negative  | direct            | automated     | Focus on the self           |
| 3  | Ascription of responsibility                    | To accept the responsibility for ones own actions                                                                                                                                                                                                                                                                                                                                                                                                                                                                                                                                                                                                           | Klößner 2013                                               | positive  | direct            | Situational   | Self-transcendent Focus     |
| 4  | Attitude of mistrust                            | People hope that governments will come up with regulatory solutions "but at the same mistrust business or government to act with long term vision" . Additionally, "other people" are not trusted to become committed towards sustainable action, which serves as a reason to not engage oneself.                                                                                                                                                                                                                                                                                                                                                           | Flynn et al. 2009, p.172; p.175; Also: Fudge & Peters 2011 | negative  | reported          | Stable        | Social Focus                |
| 5  | Availability bias                               | The inclination to "draw on readily available information that is easily accessible in memory and springs to mind quickly, [...], especially personal anecdotes of family/friends, customer testimonials, and recent, frequent, vivid, salient, emotive or concrete examples."                                                                                                                                                                                                                                                                                                                                                                              | Frederiks et al. 2015, p. 1388                             | negative  | direct            | Automated     | Not specifically assignable |
| 6  | Awareness of consequences                       | To be aware of the consequences a certain behaviour would have for oneself                                                                                                                                                                                                                                                                                                                                                                                                                                                                                                                                                                                  | Klößner 2013                                               | positive  | reported          | Situational   | Self-transcendent Focus     |
| 7  | Bayesian reasoning                              | Bayesian reasoning means anticipating the likelihood of future events via an internal model constructed from past situations.                                                                                                                                                                                                                                                                                                                                                                                                                                                                                                                               | Suomala 2020                                               | negative  | direct            | Automated     | Not specifically assignable |
| 8  | Boomerang- effect                               | Reduce one's commitment to sustainable behavior if the amount of one's own engagement is at a higher level than a communicated social norm.                                                                                                                                                                                                                                                                                                                                                                                                                                                                                                                 | Frederiks et al. 2015                                      | negative  | direct            | Automated     | Social Focus                |
| 9  | Committed Greens Cluster                        | A group that views environment as important, purchases green-labelled products, declines use of plastic bags and volunteers time for green projects.                                                                                                                                                                                                                                                                                                                                                                                                                                                                                                        | Newton and Meyers 2013                                     | positive  | reported          | Stable        | Self-transcendent Focus     |
| 10 | Competence-based trust                          | Trust for the competence, for example the perceived expertise and experience of the source                                                                                                                                                                                                                                                                                                                                                                                                                                                                                                                                                                  | Frederiks et al. 2015                                      | positive  | direct            | Situational   | Social Focus                |
| 11 | Consumed time                                   | More time that has to be spent on a certain consumption alternative (in the example more time that is needed to be spent to charge an electric car)                                                                                                                                                                                                                                                                                                                                                                                                                                                                                                         | Adnan et al. 2017; Lane and Potter 2007                    | negative  | direct            | Situational   | Focus on the self           |
| 12 | Demonstrating morality to others                | A group to which it is important to show morality to others. Symbolization focuses on demonstrating characteristics in public (e.g., The types of things I do in my spare time clearly identify me as having these characteristics)."                                                                                                                                                                                                                                                                                                                                                                                                                       | Hertz and Krettenauer 2016                                 | positive  | reported          | Stable        | Social Focus                |
| 13 | Desire for extrinsic rewards                    | Desire for the gains that a person obtains from his surroundings when showing a certain behavior, such as incentives.                                                                                                                                                                                                                                                                                                                                                                                                                                                                                                                                       | Frederiks et al. 2015                                      | both      | direct            | Automated     | Focus on the self           |
| 14 | Discretionary time                              | The amount of available time individuals do not spend on working production or on personal care.                                                                                                                                                                                                                                                                                                                                                                                                                                                                                                                                                            | Chai et al. 2015                                           | positive  | direct            | Situational   | not specifically assignable |
| 15 | Ecological behavior in neighborhoods            | Ecological behavior in neighborhoods, particularly in densely populated regions                                                                                                                                                                                                                                                                                                                                                                                                                                                                                                                                                                             | Babutsidze and Chai 2018                                   | positive  | reported          | Situational   | Social Focus                |
| 16 | Emotional bond between a child and nature       | Children who have had important experiences with nature e.g. time spent outdoors in childhood (alone or with parents, teachers or other adults) or being a witness to the destruction of a nearby natural habitat and have higher trait levels of feeling emotionally connected to the natural world.                                                                                                                                                                                                                                                                                                                                                       | Křepelková et al 2020                                      | positive  | reported          | Stable        | Self-transcendent Focus     |
| 17 | Empathy                                         | An affective state that stems from the apprehension of another's emotional state that is congruent with it                                                                                                                                                                                                                                                                                                                                                                                                                                                                                                                                                  | Eisenberg and Miller 1987 citet in Darnell et al. 2019     | positive  | reported          | Automated     | Social Focus                |
| 18 | Enabling measurements                           | This allows people to make responsible choices by providing them with education, skills and information (for example with information about consequences or possible alternatives, framed in a helpful way) and by making those choices easily accessible through the provision of suitable infrastructure.                                                                                                                                                                                                                                                                                                                                                 | Anable et al. 2006                                         | positive  | reported          | Situational   | Social Focus                |
| 19 | Encouraging measurements                        | This refers to the use of information, education, incentives, penalties and the law to encourage (motivate), and where necessary, enforce behaviour change.                                                                                                                                                                                                                                                                                                                                                                                                                                                                                                 | Anable et al. 2006                                         | positive  | reported          | Situational   | Focus on the self           |
| 20 | Engaging measurements                           | "This involves the target audience from the outset. Research shows that when people develop strategies/ policies jointly with the change agency (an approach known as co-production), they take more responsibility for their actions and are more likely to change behaviours. The issue is also raised by Ampt (2003) who notes that social marketing requires a usercentred orientation in which the users/ consumers are active participant in the change process. The social marketer seeks to build a relationship with target individuals/ communities over time. [...] (Halpern et al. 2004; DEFRA 2005; Lefebvre and Flora 1988; Andreassen 1995)" | Anable et al. 2006                                         | positive  | direct            | Situational   | social Focus                |
| 21 | Enviro-Sceptic cluster                          | Cluster of people believing that the environmental crisis is exaggerated, they have more important things to focus on, there is no regulation requiring them to and/or it's not their responsibility                                                                                                                                                                                                                                                                                                                                                                                                                                                        | Newton and Meyer 2013, p.1226                              | negative  | direct            | Stable        | Focus on the self           |
| 22 | Ethical conformist Cluster                      | A group that has social values in consumption, uses small local stores and welcomes regulation for more sustainability in consumption.                                                                                                                                                                                                                                                                                                                                                                                                                                                                                                                      | Lee et al. 2017                                            | positive  | reported          | Stable        | Self-transcendent Focus     |
| 23 | Ethical leaders                                 | Positive, ethical, transformational and transactional leadership, for example shown through initiating and considerations styles, authenticity in leading. Leader's moral actions influence their follower's trust and their willingness to be lead                                                                                                                                                                                                                                                                                                                                                                                                         | Jennings et al. 2015; Sweeney et. al. 2015                 | positive  | reported          | Situational   | Social Focus                |
| 24 |                                                 |                                                                                                                                                                                                                                                                                                                                                                                                                                                                                                                                                                                                                                                             |                                                            |           |                   |               |                             |

|    | A                                                               | B                                                                                                                                                                                                                                                                                                                                                                                                                                                                                                                                                                                                                                                                                 | C                                                                       | D         | E                 | F             | G                           |
|----|-----------------------------------------------------------------|-----------------------------------------------------------------------------------------------------------------------------------------------------------------------------------------------------------------------------------------------------------------------------------------------------------------------------------------------------------------------------------------------------------------------------------------------------------------------------------------------------------------------------------------------------------------------------------------------------------------------------------------------------------------------------------|-------------------------------------------------------------------------|-----------|-------------------|---------------|-----------------------------|
| 1  | Factor                                                          | Description                                                                                                                                                                                                                                                                                                                                                                                                                                                                                                                                                                                                                                                                       | Source                                                                  | Influence | Retreive-<br>ment | Activation C1 | Focus C1                    |
| 25 | <b>Ethic-orientated social contexts</b>                         | perceptions of ethical culture, ethics-oriented socialization in companies, ethical organizational structure (organic and flatter instead of mechanistic and rigid), knowledge about past non-prejudicial hirings action                                                                                                                                                                                                                                                                                                                                                                                                                                                          | Jennings et. Al. 2015                                                   | positive  | reported          | Situational   | Social Focus                |
| 26 | <b>Exemplifying</b>                                             | This means setting an example and ensuring consistency. Hounsham (2006) notes that, for widespread behavioural change to occur, environmental organisations, councils, governments must all follow their own advice. Even though the message to the public may be that they do not have to do everything so long as they do something, if they are to be convinced, those who represent and promote green values should aim to be a good example across a whole range of lifestyle behaviours.Enabling people to act in pro-environmental ways; engaging/motivating them; encouraging them and exemplifying sustainable behavior; and at last, if necessary, catalyzing behavior. | Anable et al. 2006                                                      | positive  | reported          | Situational   | Social Focus                |
| 27 | <b>Extrinsic religiosity</b>                                    | Utilitarian motivations underlying religious behavior                                                                                                                                                                                                                                                                                                                                                                                                                                                                                                                                                                                                                             | Jennings et al. 2015, p. 146                                            | negative  | reported          | Stable        | Focus on the self           |
| 28 | <b>Fear</b>                                                     | An unpleasant emotion caused by the threat of danger, pain, or harm, here the fear of making a mistake in organizations.                                                                                                                                                                                                                                                                                                                                                                                                                                                                                                                                                          | Turiel 2006                                                             | negative  | reported          | Automated     | Focus on the self           |
| 29 | <b>Feeling of connection with nature</b>                        | Encompassing nonhuman nature in one's sense of identity. One's connection with nature changes the concept of self, affectively influencing our attitudes toward the natural world.                                                                                                                                                                                                                                                                                                                                                                                                                                                                                                | von den Noortgaete et al 2014                                           | positive  | direct            | Stable        | Self-transcendent Focus     |
| 30 | <b>Felt pressure because of suddenness or unexpectedness</b>    | "One strong result was that all participants reported their 'moral failures' as resulting from a combination of their own emotional blindness, the suddenness and sometimes unexpectedness with which the moral issue arose. and/or situational demands for an immediate response."                                                                                                                                                                                                                                                                                                                                                                                               | Higgins D'Alessandro 2008, p. 108                                       | negative  | reported          | Automated     | Focus on the self           |
| 31 | <b>Free-Riding effect and social loafing</b>                    | Reduction of effort, withholding resources, less contribution to the common good if the same benefits can be gained without one's own effort. Additionally, there is the belief that others enjoy benefits without contributing and suspicion of others not doing their part.                                                                                                                                                                                                                                                                                                                                                                                                     | Frederiks et al., 2015                                                  | negative  | reported          | Automated     | Social Focus                |
| 32 | <b>High information quality</b>                                 | The perceived quality of the knowledge with respect to a high credibility, legitimacy, accuracy, trustworthiness, and reliability                                                                                                                                                                                                                                                                                                                                                                                                                                                                                                                                                 | Nguyen et al. 2017, p. 795                                              | positive  | direct            | Situational   | Social Focus                |
| 33 | <b>Immediate information given about individual consumption</b> | Immediate information given to an individual about his or her consumption of a particular resource, for example fuel use in cars or domestic real-time energy meters that inform households about electricity and gas consumption and carbon dioxide emissions                                                                                                                                                                                                                                                                                                                                                                                                                    | Anable 2006; Frederiks et al. 2015; Lee et al. 2020                     | positive  | reported          | Situational   | Self-transcendent Focus     |
| 34 | <b>Inductive inference</b>                                      | Extracting meaningful mental representations from sparse data, which may be too sparse to derive a valid representation.                                                                                                                                                                                                                                                                                                                                                                                                                                                                                                                                                          | Suomala 2020                                                            | negative  | reported          | Automated     | Not specifically assignable |
| 35 | <b>Information about positive social norms</b>                  | "For example, advising consumers that people similar to them (e.g., peers, neighbours) are using less energy or taking certain energy-saving actions, in addition to conveying social approval of such action [...]"                                                                                                                                                                                                                                                                                                                                                                                                                                                              | Frederiks et al. 2014, p. 1390; Fudge & Peters 2011; Brooks et al. 2013 | positive  | reported          | Situational   | Social Focus                |
| 36 | <b>Information labels on products</b>                           | Labels that can be seen on products to influence consumption such as energy efficiency labels or a "green" car label                                                                                                                                                                                                                                                                                                                                                                                                                                                                                                                                                              | Anable et al. 2006                                                      | positive  | reported          | Situational   | Self-transcendent Focus     |
| 37 | <b>Integrity-based trust</b>                                    | Trust the integrity of a source for example trough their perceived honesty, fairness, openness, and concern for others                                                                                                                                                                                                                                                                                                                                                                                                                                                                                                                                                            | Frederiks et al. 2015                                                   | positive  | direct            | Situational   | Social Focus                |
| 38 | <b>Internally conflicted</b>                                    | A group with no clear position, that experience a clash between personal and social values.                                                                                                                                                                                                                                                                                                                                                                                                                                                                                                                                                                                       | Lee et al. 2017                                                         | negative  | reported          | Stable        | Not specifically assignable |
| 39 | <b>Intrinsic religiosity</b>                                    | When religiousness is an internal motive in a person, she is likely to transcend herself against the background of a higher power in which she believes.                                                                                                                                                                                                                                                                                                                                                                                                                                                                                                                          | Jennings and colleagues 2015, p. 145f                                   | positive  | reported          | Stable        | Self-transcendent Focus     |
| 40 | <b>Intrinsic rewards</b>                                        | Operating with the positive motivation of commendation, public recognition and praise for pro-environmental behavior.                                                                                                                                                                                                                                                                                                                                                                                                                                                                                                                                                             | Frederiks 2014                                                          | positive  | reported          | Situational   | Social Focus                |
| 41 | <b>Loss aversion</b>                                            | The tendency to stick to what one already possesses because the disutility of losing something (pain of loss) is felt more intensely than the utility of gaining something (pleasure of gain).                                                                                                                                                                                                                                                                                                                                                                                                                                                                                    | Frederiks et al. 2015                                                   | negative  | direct            | Automated     | Focus on the self           |
| 42 | <b>Love for their children and grandchildren</b>                | (Grand)parents who wish for their children and grandchildren a future in an intact ecological system.                                                                                                                                                                                                                                                                                                                                                                                                                                                                                                                                                                             | Brooks et. al 2013                                                      | positive  | direct            | Stable        | Social Focus                |
| 43 | <b>Market Liberalist cluster</b>                                | A cluster (group of people) that shops in various retail formats to maximize personal benefits and reject consumption regulation for the sake of environment, has a self-focus.                                                                                                                                                                                                                                                                                                                                                                                                                                                                                                   | Lee et al. 2017                                                         | negative  | direct            | Stable        | Focus on the self           |
| 44 | <b>Material Greens</b>                                          | A group that tends to view the environment as important, but act only pro-environmentally, if it does not cost money or time.                                                                                                                                                                                                                                                                                                                                                                                                                                                                                                                                                     | Newton and Meyer 2013                                                   | negative  | r/direct          | Stable        | Not specifically assignable |
| 45 | <b>Monetary costs</b>                                           | bigger amount of money that has to be spent on a certain consumption alternative (e.g. higher cost of an electric car)                                                                                                                                                                                                                                                                                                                                                                                                                                                                                                                                                            | Adnan et al. 2017; Lane and Potter 2007                                 | negative  | direct            | Situational   | Focus on the self           |
| 46 | <b>moral attentiveness</b>                                      | moral attentiveness describes the extent to which morality and moral elements are frequently perceived and considered                                                                                                                                                                                                                                                                                                                                                                                                                                                                                                                                                             | Jennings et al. 2015                                                    | positive  | direct            | stable        | Self-transcendent Focus     |
| 47 | <b>Moral identity</b>                                           | Moral identity has been defined as "the degree to which being a moral person is important to an individual's identity" . In other words, if individuals feel that moral values such as being honest, compassionate, fair and generous are central for defining their personal identity, they have a strong moral identity.                                                                                                                                                                                                                                                                                                                                                        | Hardy & Carlo 2011a, p. 212; Hertz/Krettenauer 2016                     | positive  | direct            | Stable        | Self-transcendent Focus     |
| 48 | <b>Moral judgement disposition</b>                              | This is "the stable tendency to take a specific moral perspective in decisions and action; e.g., ethical ideology and ethical predisposition"                                                                                                                                                                                                                                                                                                                                                                                                                                                                                                                                     | Jennings et al. 2015, p. 106                                            | positive  | direct            | Automated     | Self-transcendent Focus     |
| 49 | <b>Moral sensitivity</b>                                        | Moral sensitivity "represents a general orientation toward moral implications on the basis of past decisions and behaviors"                                                                                                                                                                                                                                                                                                                                                                                                                                                                                                                                                       | Jennings et al. 2015, p. 36                                             | positive  | direct            | automated     | Self-transcendent Focus     |

|    | A                                                  | B                                                                                                                                                                                                                                                                                                                                                                                                                                                                                                                                                                                                                                                                                                                                                                                                                                                           | C                                                                                                                                                 | D         | E                 | F             | G                           |
|----|----------------------------------------------------|-------------------------------------------------------------------------------------------------------------------------------------------------------------------------------------------------------------------------------------------------------------------------------------------------------------------------------------------------------------------------------------------------------------------------------------------------------------------------------------------------------------------------------------------------------------------------------------------------------------------------------------------------------------------------------------------------------------------------------------------------------------------------------------------------------------------------------------------------------------|---------------------------------------------------------------------------------------------------------------------------------------------------|-----------|-------------------|---------------|-----------------------------|
| 1  | Factor                                             | Description                                                                                                                                                                                                                                                                                                                                                                                                                                                                                                                                                                                                                                                                                                                                                                                                                                                 | Source                                                                                                                                            | Influence | Retreive-<br>ment | Activation C1 | Focus C1                    |
| 50 | New environmental paradigm                         | This ecological worldview consists of accepting general beliefs that human activity endangers the natural equilibrium, that resources are limited, and that humans are not allowed to dominate nature.                                                                                                                                                                                                                                                                                                                                                                                                                                                                                                                                                                                                                                                      | Klöckner 2013                                                                                                                                     | positive  | direct            | Stable        | Self-transcendent Focus     |
| 51 | Occam's razor                                      | Preference for simple over complex explanations.                                                                                                                                                                                                                                                                                                                                                                                                                                                                                                                                                                                                                                                                                                                                                                                                            | Suomala 2020                                                                                                                                      | negative  | reported          | Automated     | Not specifically assignable |
| 52 | Perceived behavioral control                       | "Finally, perceived behavioural control is a measure that captures to which degree people have the opportunity and ability to perform a certain behavioural alternative."                                                                                                                                                                                                                                                                                                                                                                                                                                                                                                                                                                                                                                                                                   | Klöckner 2013, p. 1029                                                                                                                            | positive  | direct            | Situational   | Not specifically assignable |
| 53 | Postconventional stage                             | In the Defining Issue Test individuals make judgments about dilemmas concerning justice. In the postconventional Schema they focus on the ideals of social justice and cooperation that many or may not be presented in current laws.                                                                                                                                                                                                                                                                                                                                                                                                                                                                                                                                                                                                                       | Brooks at al. 2013, p.154                                                                                                                         | positive  | direct            | Stable        | Self-transcendent Focus     |
| 54 | Practicability                                     | Less practicability that a certain consumption alternative has                                                                                                                                                                                                                                                                                                                                                                                                                                                                                                                                                                                                                                                                                                                                                                                              | Adnan et al. 2017; Lane and Potter 2007                                                                                                           | negative  | direct            | Situational   | Focus on the self           |
| 55 | Preconventional stage                              | In the Defining Issue Test individuals make judgments about dilemmas concerning justice. In the Personal Interest Schema people focus on how a decision affects the welfare of themselves or close associates                                                                                                                                                                                                                                                                                                                                                                                                                                                                                                                                                                                                                                               | Brooks at al. 2013, p.154                                                                                                                         | negative  | direct            | Stable        | Focus on the self           |
| 56 | Pressure to keep up with resource-consuming trends | "[...] some see young people as intrinsically hedonistic in their pursuit of possessions for status, entertainment and identity construction. This may be rooted in the popular perception that this is simply what teenagers do (Abrams 1959), a view further magnified by the degree to which young audiences are targeted in the promotion of novelty and fashion (Chaplin and John 2005, Langer 2005, Cody 2012). Either way, the resulting picture of relatively self-indulgent consumers has received empirical support from studies of consumer behaviour, with emphasis placed on seemingly insatiable wants, the pressure to keep up with trends, and acquisition for short-term pleasure (Wilska 2003, Autio and Heinonen 2004, Russell and Tyler 2005)."                                                                                         | Hitchings et al. 2015, p. 376                                                                                                                     | negative  | reported          | Stable        | Social Focus                |
| 57 | Reminders like phone calls or posters              | Phone calls to remind one registered to participate in a pro-environmental event or reminder to conserve energy - that could be visual cues and vivid descriptions                                                                                                                                                                                                                                                                                                                                                                                                                                                                                                                                                                                                                                                                                          | Frederiks et al. 2015; Hand et al. 2019                                                                                                           | positive  | reported          | Situational   | Self-transcendent Focus     |
| 58 | Risk aversion                                      | The inclination to avoid risk when positive outcomes such as gains are to be expected and to take risks given the prospect of negative outcomes (such as losses).                                                                                                                                                                                                                                                                                                                                                                                                                                                                                                                                                                                                                                                                                           | Frederiks et al. 2015 p. 1387                                                                                                                     | negative  | reported          | Automated     | Focus on the self           |
| 59 | Role models                                        | "Through observing role models and adopting their behavior, agents can learn about actions, skills and solutions from others even in the absence of direct verbal communication. Given the limited amount of cognitive resources and a range of goals, individuals save time and cognitive resources by copying from others solutions to shared problems. This ability to learn from others is thought to play an important role in human phylogeny, where natural selection favours social learners who are able to evaluate potential models and copy the most successful among them, thereby saving the costs of individual learning (Boyd and Richerson, 1988; Buenstorf and Cordes, 2008; Cordes and Schwesinger, 2014; Bandura, 1977; Banerjee, 1992; Bikhchandani et al., 1992; Rogers, 1983; Boyd and Richerson, 1985; Henrich and Gil-White, 2001) | Babutsidze and Chai 2018, p. 297; Also: Anable et al. 2006; Fudge & Peters 2011; Frederiks et al. 2015; Jennings et al. 2015; Sweeney et al. 2015 | both      | reported          | Situational   | Social Focus                |
| 60 | Satisficing                                        | The choice to achieve a satisfactory result and not make the effort to improve it towards an optimal result.                                                                                                                                                                                                                                                                                                                                                                                                                                                                                                                                                                                                                                                                                                                                                | Frederiks et al. 2015                                                                                                                             | negative  |                   | Automated     | Focus on the self           |
| 61 | Seeing forest "as life"                            | Intrinsic relationship to the forest. Belief: "with no forest there is no life". Being conscious of the care of natural resources through the good use of soil' and usage of organic practices                                                                                                                                                                                                                                                                                                                                                                                                                                                                                                                                                                                                                                                              | Robb et. al. 2019                                                                                                                                 | positive  | direct            | Stable        | Self-transcendent Focus     |
| 62 | Self-conscious moral orientation                   | A person with this orientation tends to perceive and reflect on the moral implications of one's experiences                                                                                                                                                                                                                                                                                                                                                                                                                                                                                                                                                                                                                                                                                                                                                 | Jennings et al. 2015                                                                                                                              | positive  | direct            | stable        | Self-transcendent Focus     |
| 63 | Self-enhancement values                            | Self-enhancement values emphasize pursuing one's own interests. They contrast with self-transcendence values that emphasize transcending one's own interests for the sake of others.                                                                                                                                                                                                                                                                                                                                                                                                                                                                                                                                                                                                                                                                        | Schwartz et al. 2012                                                                                                                              | negative  | direct            | stable        | Focus on the self           |
| 64 | Selfishness                                        | The personality trait selfishness entails narcissism, egoism, and inflated expectations of personal entitlement                                                                                                                                                                                                                                                                                                                                                                                                                                                                                                                                                                                                                                                                                                                                             | Brooks et al 2013, p. 152                                                                                                                         | negative  | direct            | Stable        | Focus on the self           |
| 65 | Self-transcendence values                          | self-transcendence values emphasize transcending own interests for the sake of others. Self-transcendence, in particular, means accepting others as equals and being concerned for their welfare and includes being concerned for the environment                                                                                                                                                                                                                                                                                                                                                                                                                                                                                                                                                                                                           | Schwartz et al 2012; Klöckner 2013                                                                                                                | positive  | direct            | Stable        | Self-transcendent Focus     |
| 66 | Social norms                                       | The factor social norms can be seen as the explicit and implicit 'rules', guidelines or expectations of actions within a group or society that shape what is held to be normal or desirable.                                                                                                                                                                                                                                                                                                                                                                                                                                                                                                                                                                                                                                                                | Klöckner 2013                                                                                                                                     | both      | direct            | Stable        | Social Focus                |
| 67 | Socially responsible families                      | Parents who have an emphasis on social responsibility (e.g., being attentive to others and helping less fortunate members of society), modeled civic behavior by parents, warm and responsive families.                                                                                                                                                                                                                                                                                                                                                                                                                                                                                                                                                                                                                                                     | Brooks et al. 2013                                                                                                                                | positive  | reported          | Stable        | Social Focus                |
| 68 | Status quo bias                                    | The tendency to stick to default settings or avoid making decisions, especially when things become too complex.                                                                                                                                                                                                                                                                                                                                                                                                                                                                                                                                                                                                                                                                                                                                             | Frederiks et al. 2015                                                                                                                             | both      | reported          | Automated     | Focus on the self           |
| 69 | Sunk-cost effects                                  | An irrational fixation on recovering losses and a propensity to invest in courses of action that have already proved futile.                                                                                                                                                                                                                                                                                                                                                                                                                                                                                                                                                                                                                                                                                                                                | Frederiks et al. 2015                                                                                                                             | negative  | reported          | Automated     | Focus on the self           |
| 70 | Sympathy                                           | An emotional response stemming from another's emotional state that is not identical to the other's emotion but consists of feelings of sorrow or concern for another's welfare                                                                                                                                                                                                                                                                                                                                                                                                                                                                                                                                                                                                                                                                              | Eisenberg and Miller 1987 citet in Darnell et al. 2019                                                                                            | positive  | reported          | Automated     | Social Focus                |
| 71 | Temporal and spatial discounting                   | Not linking behaviors to effects when the latter are considered distant in either space or time (such as climate change).                                                                                                                                                                                                                                                                                                                                                                                                                                                                                                                                                                                                                                                                                                                                   | Frederiks et al. 2015; Flynn et al. 2009                                                                                                          | negative  | reported          | Automated     | Focus on the self           |

|    | A                                                       | B                                                                                                                                                                                                                                                                                                                                                                                                                                                                                                                                                                                                                                     | C                                                                                                  | D         | E                   | F             | G                       |
|----|---------------------------------------------------------|---------------------------------------------------------------------------------------------------------------------------------------------------------------------------------------------------------------------------------------------------------------------------------------------------------------------------------------------------------------------------------------------------------------------------------------------------------------------------------------------------------------------------------------------------------------------------------------------------------------------------------------|----------------------------------------------------------------------------------------------------|-----------|---------------------|---------------|-------------------------|
| 1  | Factor                                                  | Description                                                                                                                                                                                                                                                                                                                                                                                                                                                                                                                                                                                                                           | Source                                                                                             | Influence | Retrie-<br>ment     | Activation C1 | Focus C1                |
| 72 | <b>Tendency to confirm to social norms</b>              | The mechanism to make social comparisons, follow the behavior of others, and follow the explicit and implicit 'rules', guidelines or behavioral expectations within a group or society that shape what is deemed normal or desirable                                                                                                                                                                                                                                                                                                                                                                                                  | Frederiks et al. 2015, p. 1387                                                                     | both      | reported            | Automated     | Social Focus            |
| 73 | <b>Trust felt towards the source of the information</b> | "Many authors advocate the use of more relevant or 'trusted messengers' in order to improve credibility and legitimacy in the communication of climate change to lay audiences (Lowe et al. 2005; Hounsham 2006; Alexander Ballard and Associates 2005). Some organisations appear to often be better placed to change attitudes and behaviours than others. Therefore information on transport and climate change would be best received if it came from a trusted source (independent of government) that acknowledged areas of debate on key issues before recommending a consensus view (Alexander Ballard and Associates 2005)." | Anable et al. 2006, p. 110<br>Also: Flynn et al., 2009; Frederiks et al., 2015; Nguyen et al. 2017 | positive  | reported/<br>direct | Situational   | Social Focus            |
| 74 | <b>Unethical leaders</b>                                | Negative and unethical leader behaviors, for example shown through abusive leadership                                                                                                                                                                                                                                                                                                                                                                                                                                                                                                                                                 | Jennings et al. 2015                                                                               | negative  | reported            | Situational   | Social Focus            |
| 75 | <b>Unethical social contexts</b>                        | Contexts that impair self-regulatory functioning or heighten self-interest such as observation of coworker unethical behavior, power, primed self interest or mistreatment                                                                                                                                                                                                                                                                                                                                                                                                                                                            | Jennings et al. 2015                                                                               | negative  | reported            | Situational   | Social Focus            |
| 76 | <b>Unselfishness</b>                                    | Unselfish acts someone who "gives weight to the interests of others, possibly even having to make uncompensated sacrifices. In doing so, the moral actor's motivation would likely not have self-interested goals as most highly prioritized"                                                                                                                                                                                                                                                                                                                                                                                         | Brooks et al. 2013, p. 152                                                                         | positive  | direct              | Stable        | Self-transcendent Focus |
| 77 | <b>Value achievement</b>                                | To value success according to social standards to gain admiration and power                                                                                                                                                                                                                                                                                                                                                                                                                                                                                                                                                           | Schwartz et al. 2012                                                                               | negative  | direct              | Stable        | Focus on the self       |
| 78 | <b>Value benevolence</b>                                | To value preservation and enhancement of the welfare of people with whom one is in frequent personal contact. Being a reliable and trustworthy member of the ingroup                                                                                                                                                                                                                                                                                                                                                                                                                                                                  | Schwartz et al. 2012                                                                               | positive  | reported            | Stable        | Self-transcendent Focus |
| 79 | <b>Value face</b>                                       | To value maintaining control through status and prestige                                                                                                                                                                                                                                                                                                                                                                                                                                                                                                                                                                              | Schwartz et al. 2012                                                                               | negative  | direct              | Stable        | Focus on the self       |
| 80 | <b>Value hedonism</b>                                   | To value seeking pleasure and sensuous gratification for oneself                                                                                                                                                                                                                                                                                                                                                                                                                                                                                                                                                                      | Schwartz et al. 2012                                                                               | negative  | direct              | Stable        | Focus on the self       |
| 81 | <b>Value humility</b>                                   | humility as a growth value is grounded in freedom from anxiety. Being humble/modest, selfeffacing and accepting ones portion/submitting to life's circumstances. Not drawing attention to oneself and not asking for more, being satisfied with what one has.                                                                                                                                                                                                                                                                                                                                                                         | Schwartz et al. 2012                                                                               | positive  | reported            | Stable        | Self-transcendent Focus |
| 82 | <b>Value power</b>                                      | To value social status and prestige, control or dominance over people or material and social resources                                                                                                                                                                                                                                                                                                                                                                                                                                                                                                                                | Schwartz et al. 2012                                                                               | negative  | direct              | Stable        | Focus on the self       |
| 83 | <b>Value universalism</b>                               | To value understanding, appreciation, tolerance and protection of the welfare of all people and of nature.                                                                                                                                                                                                                                                                                                                                                                                                                                                                                                                            | Schwartz et al. 2012                                                                               | positive  | direct              | Stable        | Self-transcendent Focus |
| 84 | <b>Willingness to sacrifice for the environment</b>     | When confronted with day-to-day environmental dilemmas, willingness to sacrifice for the environment represents the extent to which individuals' decisions will take into account the well-being of the environment, even at the expense of immediate self-interest, effort, or costs.                                                                                                                                                                                                                                                                                                                                                | Davis et al. 2011, p. 259                                                                          | positive  | direct              | Stable        | Self-transcendent Focus |
